# Supplementary material for: Functional Characterization of Multiple Ehrlichia chaffeensis Sodium (Cation)/Proton Antiporter Genes Involved in the Bacterial pH Homeostasis
Source: MDPI journal article supplement (doi:10.3390/ijms22168420), 2021-08-05
Supplement: s1 [file s1]

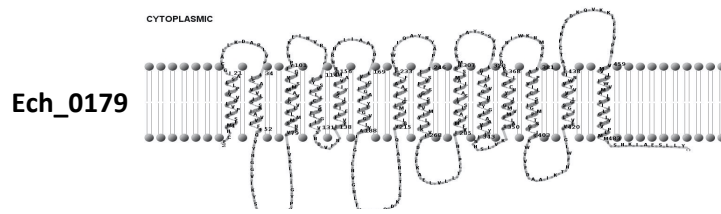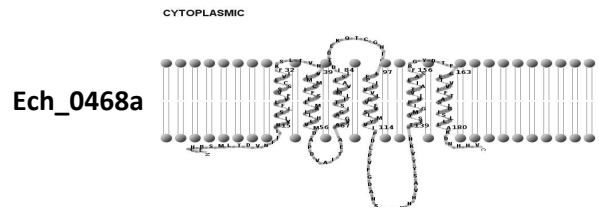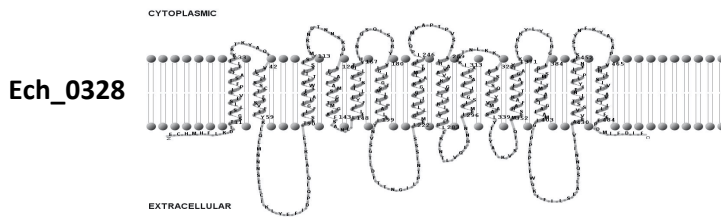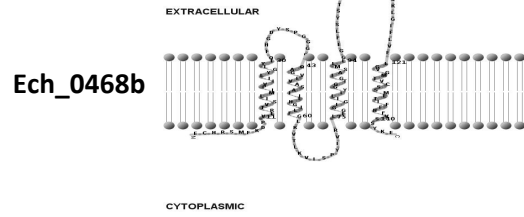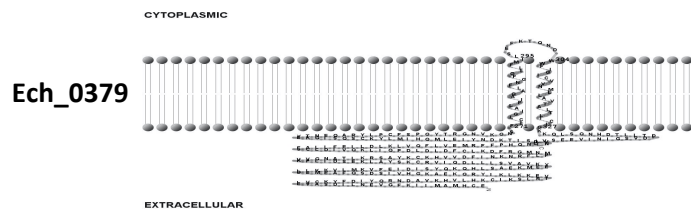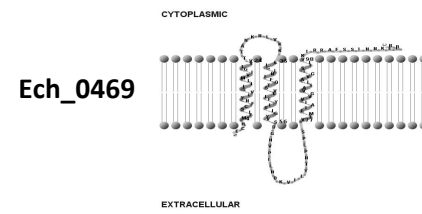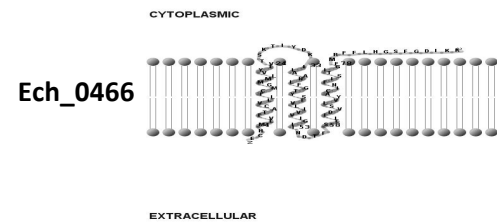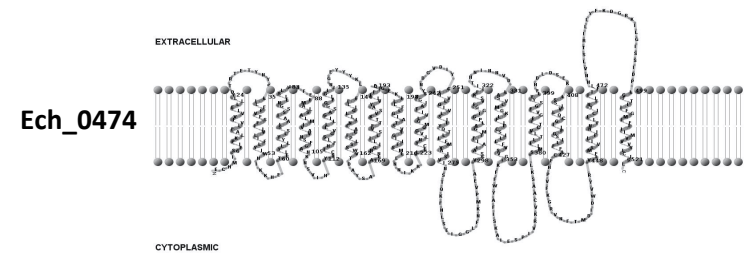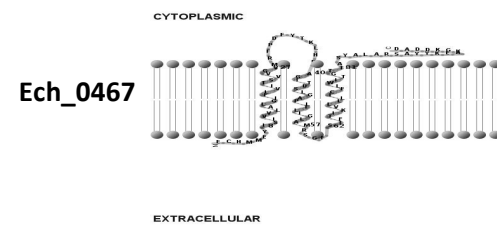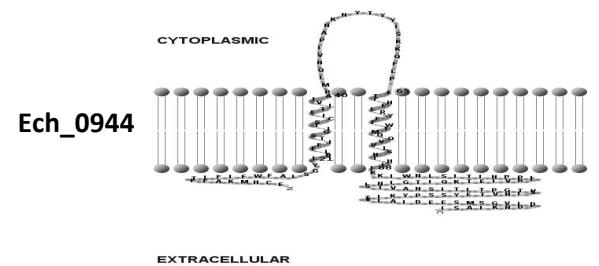

Figure S1. Prediction of transmembrane domains in *E. chaffeensis* antiporters

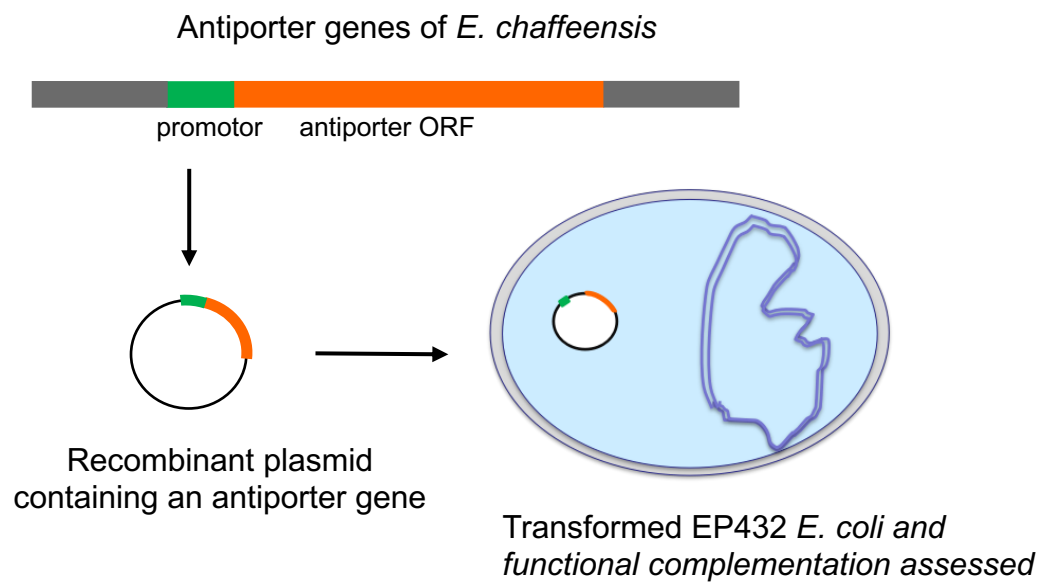

Figure S2: A cartoon depicting the *E. coli* function complementation system used in defining *E. chaffeensis* antiporters
